# Supplementary material for: Urban Green Connectivity Assessment: A Comparative Study of Datasets in European Cities
Source: MDPI journal article supplement (doi:10.3390/rs16050771), 2024-02-22
Supplement: s1 [file s1]

Supplementary Materials

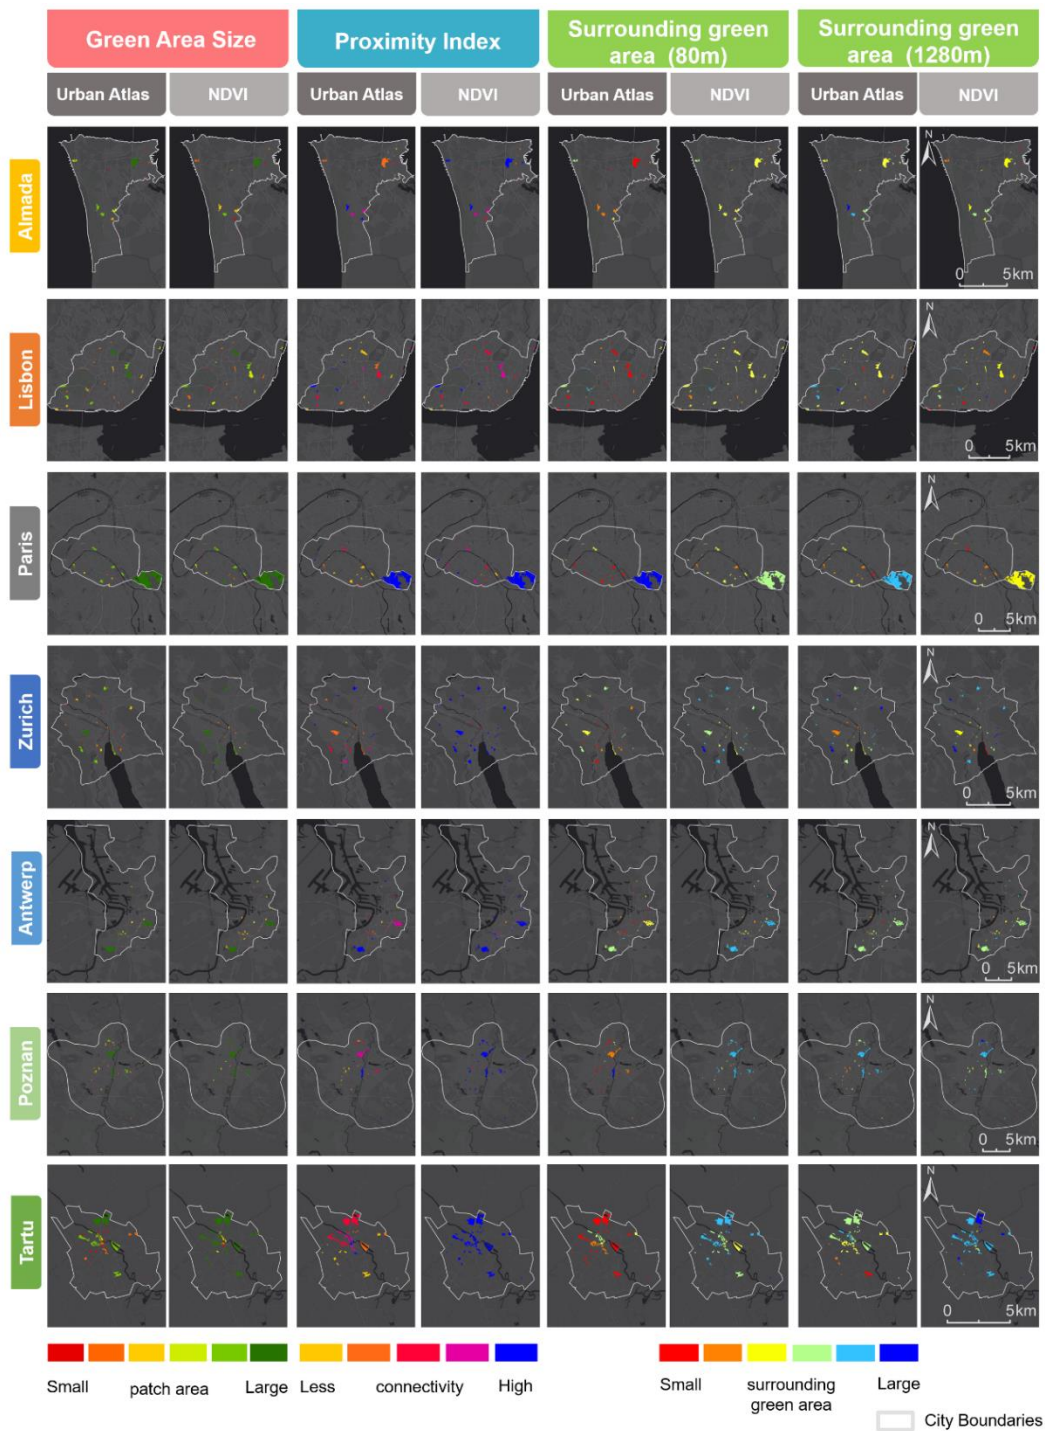

**Figure S1.** Spatial distribution of all urban landscape metrics using land cover classification (the Urban Atlas) and spectral data (NDVI). Note that the spatial scale is different in cities.



|                                                        |     |       |      |     |      |      |      |       |      |      |       |      |      |      |      |      |       |      |     |       |      |      |      |
|--------------------------------------------------------|-----|-------|------|-----|------|------|------|-------|------|------|-------|------|------|------|------|------|-------|------|-----|-------|------|------|------|
| Airports                                               | -   | -     | -    | 310 | 3.57 | 0.10 | 9    | 0.08  | 0.46 | -    | -     | -    | 54   | 0.24 | 0.61 | 274  | 1.07  | 0.50 | 0   | 0.00  | 0.77 | 661  | 0.20 |
| Mineral extraction and dump sites                      | 20  | 0.29  | 0.22 | 11  | 0.12 | 0.29 | 5    | 0.05  | 0.23 | 6    | 0.06  | 0.25 | 83   | 0.37 | 0.46 | 62   | 0.24  | 0.49 | 23  | 0.59  | 0.55 | 191  | 0.34 |
| Construction sites                                     | 47  | 0.67  | 0.30 | 49  | 0.56 | 0.29 | 52   | 0.49  | 0.11 | 57   | 0.62  | 0.30 | 32   | 0.14 | 0.41 | 117  | 0.45  | 0.40 | 69  | 1.79  | 0.50 | 433  | 0.35 |
| Land without current use                               | 107 | 1.53  | 0.38 | 90  | 1.03 | 0.35 | 6    | 0.06  | 0.36 | 30   | 0.32  | 0.59 | 86   | 0.38 | 0.62 | 287  | 1.12  | 0.63 | 23  | 0.59  | 0.63 | 634  | 0.51 |
| Green urban areas *                                    | 467 | 6.67  | 0.57 | 642 | 7.39 | 0.53 | 1706 | 16.26 | 0.68 | 448  | 4.87  | 0.72 | 804  | 3.59 | 0.83 | 1918 | 7.48  | 0.79 | 249 | 6.41  | 0.79 | 6229 | 0.62 |
| Sports and leisure facilities                          | 261 | 3.73  | 0.46 | 332 | 3.83 | 0.30 | 607  | 5.79  | 0.47 | 412  | 4.47  | 0.58 | 342  | 1.53 | 0.58 | 1174 | 4.58  | 0.68 | 82  | 2.11  | 0.70 | 3207 | 0.47 |
| Arable land (annual crops)                             | 466 | 6.65  | 0.39 | 122 | 1.41 | 0.33 | -    | -     | -    | 351  | 3.81  | 0.59 | 1282 | 5.72 | 0.62 | 4071 | 15.88 | 0.50 | 84  | 2.17  | 0.72 | 6344 | 0.55 |
| Permanent crops (vineyards, fruit trees, olive groves) | 40  | 0.57  | 0.40 | 19  | 0.22 | 0.32 | -    | -     | -    | 80   | 0.87  | 0.68 | -    | -    | -    | -    | -     | -    | -   | -     | -    | 140  | 0.56 |
| Pastures                                               | 443 | 6.34  | 0.40 | 172 | 1.98 | 0.33 | -    | -     | -    | 421  | 4.58  | 0.71 | 1256 | 5.60 | 0.75 | 3132 | 12.22 | 0.70 | 628 | 16.19 | 0.74 | 6040 | 0.62 |
| Forests *                                              | 867 | 12.38 | 0.67 | 663 | 7.63 | 0.74 | -    | -     | -    | 2133 | 23.19 | 0.91 | 883  | 3.94 | 0.87 | 2859 | 11.16 | 0.88 | 218 | 5.61  | 0.89 | 7551 | 0.76 |
| Herbaceous vegetation associations                     | 546 | 7.80  | 0.46 | 100 | 1.16 | 0.39 | -    | -     | -    | 55   | 0.60  | 0.69 | 31   | 0.14 | 0.55 | -    | -     | -    | 35  | 0.91  | 0.69 | 806  | 0.50 |
| Open spaces with little or no vegetation               | 37  | 0.53  | 0.08 | -   | -    | -    | -    | -     | -    | -    | -     | -    | 2    | 0.01 | 0.32 | -    | -     | -    | 1   | 0.03  | 0.35 | 42   | 0.22 |

|                                        |     |      |       |      |       |       |      |       |       |     |      |      |      |       |       |      |      |      |     |      |      |      |      |
|----------------------------------------|-----|------|-------|------|-------|-------|------|-------|-------|-----|------|------|------|-------|-------|------|------|------|-----|------|------|------|------|
| Wetlands                               | 1   | 0.01 | 0.71  | 2    | 0.03  | 0.01  | -    | -     | -     | 6   | 0.07 | 0.75 | 24   | 0.11  | 0.65  | -    | -    | -    | 44  | 1.13 | 0.71 | 78   | 0.62 |
| Water                                  | 13  | 0.19 | -0.11 | 37   | 0.43  | -0.23 | 249  | 2.37  | -0.33 | 136 | 1.48 | 0.04 | 4084 | 18.22 | -0.52 | 539  | 2.10 | 0.01 | 75  | 1.93 | 0.13 | 5561 | 0.11 |
| Other roads and associated land        | 640 | 9.14 | 0.23  | 1195 | 13.76 | 0.20  | 1484 | 14.14 | 0.15  | 597 | 6.49 | 0.33 | 1287 | 5.74  | 0.29  | 1225 | 4.78 | 0.41 | 285 | 7.35 | 0.46 | 6692 | 0.31 |
| Fast transit roads and associated land | 58  | 0.83 | 0.19  | 74   | 0.85  | 0.27  | 11   | 0.10  | 0.27  | 71  | 0.77 | 0.20 | 454  | 2.02  | 0.48  | 110  | 0.43 | 0.45 | -   | -    | -    | 769  | 0.29 |
| Railways and associated land           | 23  | 0.33 | 0.19  | 102  | 1.18  | 0.09  | 258  | 2.46  | 0.06  | 199 | 2.17 | 0.17 | 955  | 4.26  | 0.22  | 373  | 1.45 | 0.49 | 38  | 0.99 | 0.47 | 1950 | 0.25 |

**Table S2.** Earth observation data used to determine urban green areas in European cities involved.

| City    | Sensor         | Resolution | Date                | Cloud Coverage | Coordinate System  |
|---------|----------------|------------|---------------------|----------------|--------------------|
| Almada  | Sentinel<br>2A | 10 m       | 14/07/2017 11:30:33 | 0.2754 %       | WGS 1984 – UTM 29N |
| Lisbon  |                |            | 14/07/2017 11:21:14 | 0.0000 %       | WGS 1984 – UTM 29N |
| Paris   |                |            | 27/08/2017 11:04:48 | 5.8191 %       | WGS 1984 – UTM 31N |
| Zürich  |                |            | 06/07/2017 10:23:01 | 6.5441 %       | WGS 1984 – UTM 32N |
| Antwerp |                |            | 26/05/2017 10:55:18 | 0.0000 %       | WGS 1984 – UTM 31N |
| Poznan  |                |            | 30/07/2017 10:05:35 | 0.0000 %       | WGS 1984 – UTM 33N |
| Tartu   |                |            | 30/08/2017 09:33:31 | 0.1469 %       | WGS 1984 – UTM 35N |
